# Supplementary material for: Characterization of the antibody response against EV71 capsid proteins in Chinese individuals by NEIBM-ELISA
Source: PubMed Central journal article supplement (PMC4448526; doi:10.1038/srep10636), 2015-05-29
Supplement: srep10636-s1.pdf [file srep10636-s1.pdf]

# **Characterization of the antibody response against EV71 capsid proteins in Chinese individuals by NEIBM-ELISA**

Yingying Ding<sup>1</sup>, Xuguang Chen<sup>2</sup>, Baohua Qian<sup>3</sup>, Guorong Wu<sup>4</sup>, Ting He<sup>1</sup>,  
Jiaojiao Feng<sup>1</sup>, Caixia Gao<sup>1</sup>, Lili Wang<sup>1</sup>, Jinhong Wang<sup>1</sup>, Xiangyu Li<sup>1</sup>,  
Mingmei Cao<sup>1</sup>, Heng Peng<sup>1</sup>, Chunyan Zhao<sup>1</sup>, Wei Pan<sup>1\*</sup>

<sup>1</sup>Department of Medical Microbiology and Parasitology, School of Basic Medicine, Second Military Medical University.

<sup>2</sup>Department of pediatrics, Wuxi people's hospital, Jiangsu, China.

<sup>3</sup>Department of Blood Transfusion, Changhai Hospital, Second Military Medical University, Shanghai, China,

<sup>4</sup>Department of Clinical Laboratory, Wuxi people's hospital, Jiangsu, China.

\*Send correspondence to Prof. Wei Pan, Department of Medical Microbiology and Parasitology, School of Basic Medicine, Second Military Medical University, Shanghai 200433, China.

Tel: +86 21 81870989. E-mail: pwpanwei@126.com

| (a) |          |          |          |        | (b) |          |          |          |     | (c)      |          |          |  |  |
|-----|----------|----------|----------|--------|-----|----------|----------|----------|-----|----------|----------|----------|--|--|
| NO. | anti-VP1 | anti-VP0 | anti-VP3 | pET32a | NO. | anti-VP1 | anti-VP0 | anti-VP3 | NO. | anti-VP1 | anti-VP0 | anti-VP3 |  |  |
| 59  | 1.834    | 0.255    | 0.103    | 0.094  | 67  | 0.618    | 0.304    | 0.1      | 122 | 0.674    | 0.287    | 0.338    |  |  |
| 42  | 1.61     | 0.28     | 0.097    | 0.06   | 90  | 0.368    | 0.302    | 0.163    | 136 | 0.553    | 0.286    | 0.322    |  |  |
| 187 | 1.477    | 0.282    | 0.158    | 0.064  | 118 | 0.608    | 0.301    | 0.189    | 153 | 0.591    | 0.282    | 0.265    |  |  |
| 97  | 1.321    | 0.295    | 0.107    | 0.089  | 165 | 0.524    | 0.3      | 0.166    | 126 | 0.313    | 0.294    | 0.262    |  |  |
| 131 | 1.282    | 0.278    | 0.171    | 0.076  | 178 | 0.534    | 0.296    | 0.209    | 177 | 1.1      | 0.289    | 0.261    |  |  |
| 177 | 1.1      | 0.289    | 0.261    | 0.077  | 97  | 1.321    | 0.295    | 0.107    | 178 | 0.534    | 0.296    | 0.209    |  |  |
| 51  | 1.076    | 0.255    | 0.077    | 0.092  | 126 | 0.313    | 0.294    | 0.262    | 118 | 0.608    | 0.301    | 0.189    |  |  |
| 163 | 0.926    | 0.287    | 0.147    | 0.089  | 177 | 1.1      | 0.289    | 0.261    | 172 | 0.774    | 0.279    | 0.186    |  |  |
| 172 | 0.774    | 0.279    | 0.186    | 0.097  | 200 | 0.391    | 0.288    | 0.139    | 162 | 0.393    | 0.286    | 0.184    |  |  |
| 49  | 0.747    | 0.264    | 0.11     | 0.052  | 122 | 0.674    | 0.287    | 0.338    | 131 | 1.282    | 0.278    | 0.171    |  |  |
| 122 | 0.674    | 0.287    | 0.338    | 0.098  | 163 | 0.926    | 0.287    | 0.147    | 142 | 0.379    | 0.279    | 0.17     |  |  |
| 3   | 0.669    | 0.272    | 0.133    | 0.032  | 136 | 0.553    | 0.286    | 0.322    | 165 | 0.524    | 0.3      | 0.166    |  |  |
| 67  | 0.618    | 0.304    | 0.1      | 0.065  | 162 | 0.393    | 0.286    | 0.184    | 90  | 0.368    | 0.302    | 0.163    |  |  |
| 118 | 0.608    | 0.301    | 0.189    | 0.096  | 153 | 0.591    | 0.282    | 0.265    | 187 | 1.477    | 0.282    | 0.158    |  |  |
| 191 | 0.598    | 0.281    | 0.139    | 0.074  | 187 | 1.477    | 0.282    | 0.158    | 170 | 0.451    | 0.278    | 0.156    |  |  |
| 153 | 0.591    | 0.282    | 0.265    | 0.068  | 191 | 0.598    | 0.281    | 0.139    | 50  | 0.306    | 0.264    | 0.156    |  |  |
| 65  | 0.589    | 0.269    | 0.125    | 0.099  | 34  | 0.274    | 0.281    | 0.089    | 163 | 0.926    | 0.287    | 0.147    |  |  |
| 136 | 0.553    | 0.286    | 0.322    | 0.08   | 42  | 1.61     | 0.28     | 0.097    | 200 | 0.391    | 0.288    | 0.139    |  |  |
| 178 | 0.534    | 0.296    | 0.209    | 0.085  | 66  | 0.204    | 0.28     | 0.118    | 191 | 0.598    | 0.281    | 0.139    |  |  |
| 165 | 0.524    | 0.3      | 0.166    | 0.09   | 88  | 0.243    | 0.28     | 0.133    | 88  | 0.243    | 0.28     | 0.133    |  |  |
| 170 | 0.451    | 0.278    | 0.156    | 0.072  | 142 | 0.379    | 0.279    | 0.17     | 3   | 0.669    | 0.272    | 0.133    |  |  |
| 40  | 0.434    | 0.263    | 0.109    | 0.085  | 172 | 0.774    | 0.279    | 0.186    | 65  | 0.589    | 0.269    | 0.125    |  |  |
| 193 | 0.433    | 0.269    | 0.12     | 0.068  | 39  | 0.219    | 0.278    | 0.11     | 193 | 0.433    | 0.269    | 0.12     |  |  |
| 92  | 0.423    | 0.278    | 0.101    | 0.082  | 92  | 0.423    | 0.278    | 0.101    | 66  | 0.204    | 0.28     | 0.118    |  |  |
| 162 | 0.393    | 0.286    | 0.184    | 0.07   | 131 | 1.282    | 0.278    | 0.171    | 39  | 0.219    | 0.278    | 0.11     |  |  |
| 200 | 0.391    | 0.288    | 0.139    | 0.056  | 170 | 0.451    | 0.278    | 0.156    | 49  | 0.747    | 0.264    | 0.11     |  |  |
| 142 | 0.379    | 0.279    | 0.17     | 0.066  | 12  | 0.283    | 0.276    | 0.104    | 40  | 0.434    | 0.263    | 0.109    |  |  |
| 90  | 0.368    | 0.302    | 0.163    | 0.045  | 3   | 0.669    | 0.272    | 0.133    | 97  | 1.321    | 0.295    | 0.107    |  |  |
| 126 | 0.313    | 0.294    | 0.262    | 0.064  | 65  | 0.589    | 0.269    | 0.125    | 12  | 0.283    | 0.276    | 0.104    |  |  |
| 50  | 0.306    | 0.264    | 0.156    | 0.081  | 193 | 0.433    | 0.269    | 0.12     | 59  | 1.834    | 0.255    | 0.103    |  |  |
| 12  | 0.283    | 0.276    | 0.104    | 0.064  | 49  | 0.747    | 0.264    | 0.11     | 92  | 0.423    | 0.278    | 0.101    |  |  |
| 34  | 0.274    | 0.281    | 0.089    | 0.098  | 50  | 0.306    | 0.264    | 0.156    | 67  | 0.618    | 0.304    | 0.1      |  |  |
| 88  | 0.243    | 0.28     | 0.133    | 0.056  | 40  | 0.434    | 0.263    | 0.109    | 42  | 1.61     | 0.28     | 0.097    |  |  |
| 39  | 0.219    | 0.278    | 0.11     | 0.078  | 51  | 1.076    | 0.255    | 0.077    | 34  | 0.274    | 0.281    | 0.089    |  |  |
| 66  | 0.204    | 0.28     | 0.118    | 0.064  | 59  | 1.834    | 0.255    | 0.103    | 51  | 1.076    | 0.255    | 0.077    |  |  |

Figure S1. Determination of the cutoff values for anti-EV71 ELISA detection in sera samples from normal adults. (a) The samples of anti-EV71 VP1 with OD values below 0.300 (tentative cutoff value) did not react overtly with VP3 or VP0; (b) the samples of anti-EV71 VP0 with OD values below 0.286 (tentative cutoff value) did not react overtly with VP3 and did not always react strongly with VP1; (c) the samples of anti-EV71 VP3 with OD values below 0.200 (tentative cutoff value) did not always react strongly with VP3 and VP1.

Table 1. Baseline characteristics of the study participants

|                              | Blood Donor    | non-HFMD Children | Severe HFMD cases |
|------------------------------|----------------|-------------------|-------------------|
| <b>Number<sup>a</sup></b>    | 200            | 194               | 33                |
| <b>Time</b>                  | 2011.2.24-3.17 | 2011.6.27-7.4     | 2011.6.27-7.4     |
| <b>Age (yr)</b>              |                |                   |                   |
| Mean $\pm$ s.d. <sup>b</sup> | 27.0 $\pm$ 7.6 | 3.0 $\pm$ 2.4     | 3.5 $\pm$ 2.6     |
| Range                        | 18-48          | 1-12              | 1-11              |
| <b>Sex (%)</b>               |                |                   |                   |
| Male                         | 52.5%          | 59.3%             | 60.6%             |
| Female                       | 47.5%          | 40.7%             | 39.4%             |

<sup>a</sup>Number of evaluable individuals; <sup>b</sup>Standard deviation;

**Table 2.** Primers for amplifying EV71 capsids and truncated VP1.

| Primers | Sequences (5' - 3')                  | Description                                                                                                                                                                                                                                                                                                                |
|---------|--------------------------------------|----------------------------------------------------------------------------------------------------------------------------------------------------------------------------------------------------------------------------------------------------------------------------------------------------------------------------|
| uVP0    | GCGCGCGGATCCATGGGTTCTCAGGTTTCT       | The primer pairs uVP0/dVP0 and uVP3/dVP3 were used to amplify VP0 and VP3, respectively. uVP0, uVP3 contain BamHI restriction sites (underlined), dVP0, dVP3 contain HindIII restriction site (underlined).                                                                                                                |
| dVP0    | GCGCGCAAGCTTTTACTGAGTAACAGCCTGACG    |                                                                                                                                                                                                                                                                                                                            |
| uVP3    | GCGCGCGGATCCGGTTTCCCGACTGA ACTG      |                                                                                                                                                                                                                                                                                                                            |
| dVP3    | GCGCGCAAGCTTTTA CTGGATAGTACCAGTCTG   |                                                                                                                                                                                                                                                                                                                            |
| uVP1-0  | GCGCCGGGATCCGGTGACCGTGTTG CTGAC      | The primer pairs uVP1-0/dVP1-0, uVP1-1/dVP1-0 and uVP1-2/dVP1-0 were used to amplify VP1 <sub>1-297</sub> , VP1 <sub>41-297</sub> , VP1 <sub>61-297</sub> , respectively. uVP1-0, uVP1-1, uVP1-2 contain BamHI restriction sites (underlined), dVP1-0 contain HindIII restriction site (underlined).                       |
| uVP1-1  | GCGCGCGGATCCACTGGTAAAGTTCC GGCTCTG   |                                                                                                                                                                                                                                                                                                                            |
| uVP1-2  | GCGCGCGGATCCGAATCTATGATCGA AACTC     |                                                                                                                                                                                                                                                                                                                            |
| dVP1-0  | GCGCCGAAGCTTCTACAGAGTAGTAGCAGT       |                                                                                                                                                                                                                                                                                                                            |
| uVP1-4  | CGCGCGGGATCCGGTGACCGTGTTG CTGACGT    |                                                                                                                                                                                                                                                                                                                            |
| dVP1-4  | GCCGGCAAGCTTTTA GTCAGAAGCGTTAGAAGAAG |                                                                                                                                                                                                                                                                                                                            |
| uVP1-5  | CGCGCGGATCCGAATTCACCTTTCGT TGCTTG    | The primer pairs uVP1-4/dVP1-4, uVP1-5/dVP1-5, and VP1-6/dVP1-6 were used to amplify VP1 <sub>1-60</sub> , VP1 <sub>134-297</sub> , and VP1 <sub>45-58</sub> , respectively. uVP1-4, uVP1-5, uVP1-6 contain BamHI restriction sites (underlined), dVP1-4, dVP1-5 and dVP1-6 contain HindIII restriction site (underlined). |
| dVP1-5  | GCCGGCAAGCTTTTACAGAGTAGTAGCAGTACGAGA |                                                                                                                                                                                                                                                                                                                            |
| uVP1-6  | CGCGCGGGATCCCGGCTCTGCAGG CTGCTG      |                                                                                                                                                                                                                                                                                                                            |
| dVP1-6  | GCCGGCAAGCTTTTA AGCGTTAGAAGAAGCACC   |                                                                                                                                                                                                                                                                                                                            |
